# Supplementary material for: Aberrant epigenetic silencing of neuronatin is a frequent event in human osteosarcoma
Source: PubMed Central journal article supplement (PMC7244018; doi:10.18632/oncotarget.27583), 2020-05-19
Supplement: oncotarget-11-1876-s001.pdf [file oncotarget-11-1876-s001.pdf]

## Aberrant epigenetic silencing of neuronatin is a frequent event in human osteosarcoma

### SUPPLEMENTARY MATERIALS

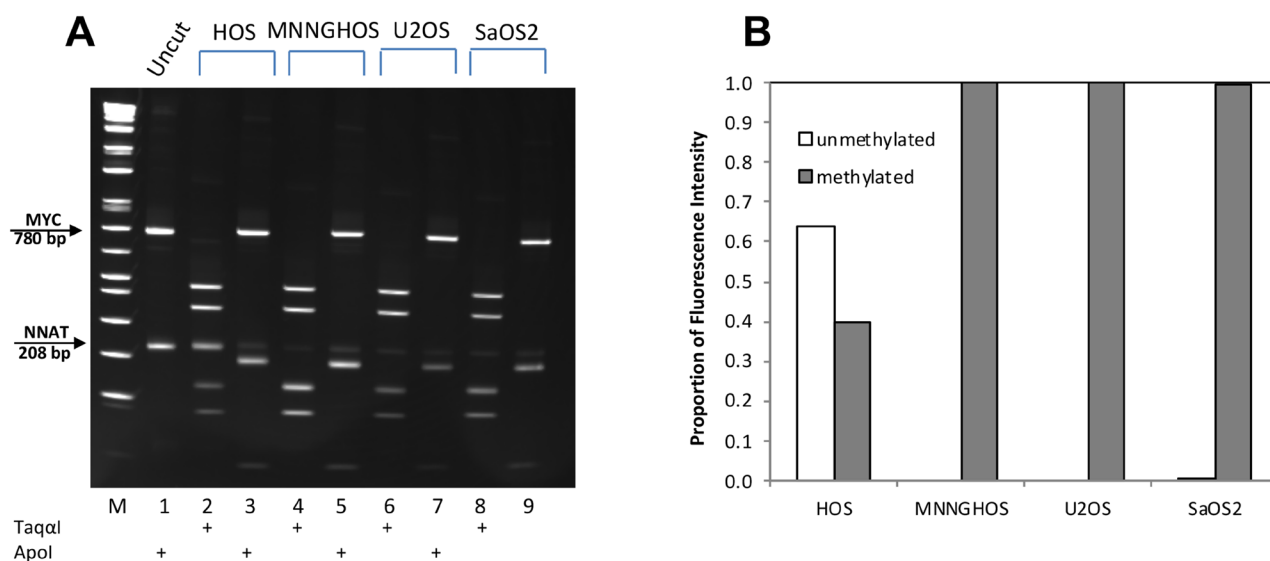

**Supplementary Figure 1: COBRA analysis demonstrates *NNAT* hypermethylation in osteosarcoma cell lines.** (A) COBRA analysis was performed on bisulfite-modified cell line DNA as described. PCR products were digested with Taq<sup>I</sup> or ApoI. A 280 bp *MYC* CpG island PCR product was added to each *NNAT* amplification product as a control for completeness of Taq<sup>I</sup> digestion. Digested DNA was fractionated on a polyacrylamide gel. Restriction fragment lengths are as follows: *MYC*/Taq<sup>I</sup> – undigested 780 bp, digested – 424 bp and 356 bp; *NNAT*/Taq<sup>I</sup> – undigested 208 bp, digested 127 bp and 81 bp. DNA samples are (lanes L to R): M, 1 kb ladder; 1, undigested control PCR products; 2, HOS/Taq<sup>I</sup>; 3, HOS/ApoI; 4, MNNGHOS/Taq<sup>I</sup>; 5, MNNGHOS/ApoI; 6, U-2 OS/Taq<sup>I</sup>; 7, U-2 OS/ApoI; 8, Saos-2/Taq<sup>I</sup>; 9, Saos-2/ApoI. (B) The proportions of methylated versus unmethylated *NNAT* alleles were quantitated for Figure 2A by analysis of the ethidium bromide-stained gel under UV illumination as described. Shown is a representative result of 3 experiments.

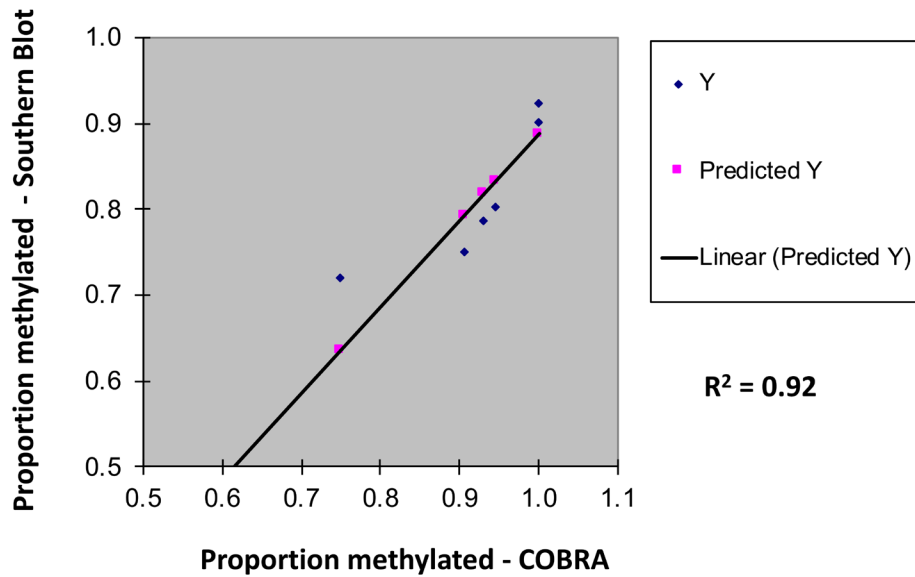

**Supplementary Figure 2: Allelic methylation as quantitated by Southern blot analysis versus COBRA was compared for 7 osteosarcoma tumor samples by regression analysis.** Shown are the proportions of methylated alleles detected by each modality. An  $R^2$  of 0.92 was observed.

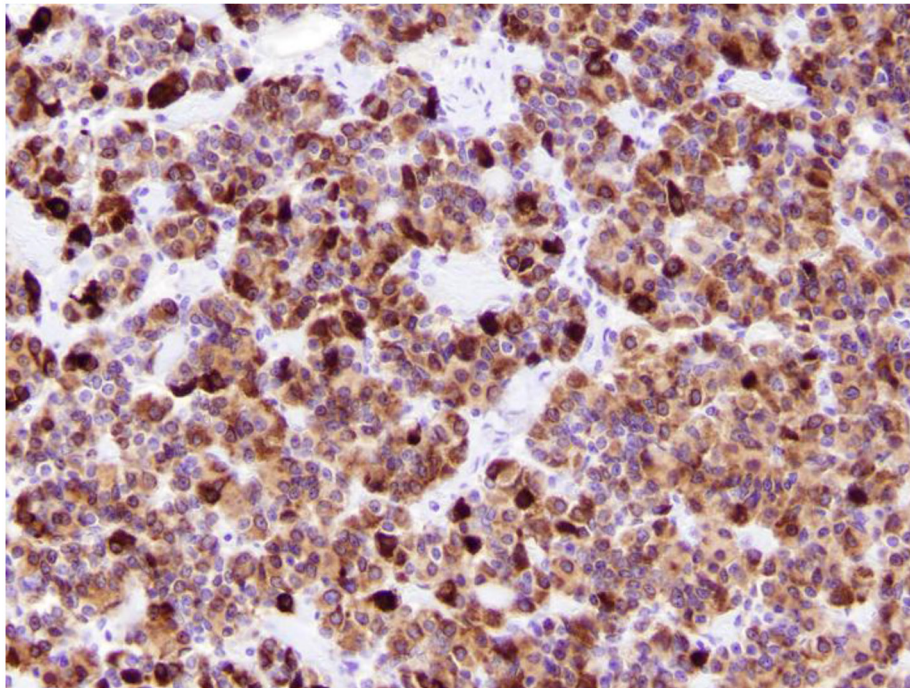

**Supplementary Figure 3: Neuronatin expression was detectable in human anterior pituitary cells.** A slide of human anterior pituitary tissue was treated with an antibody to human neuronatin and secondary antibody.

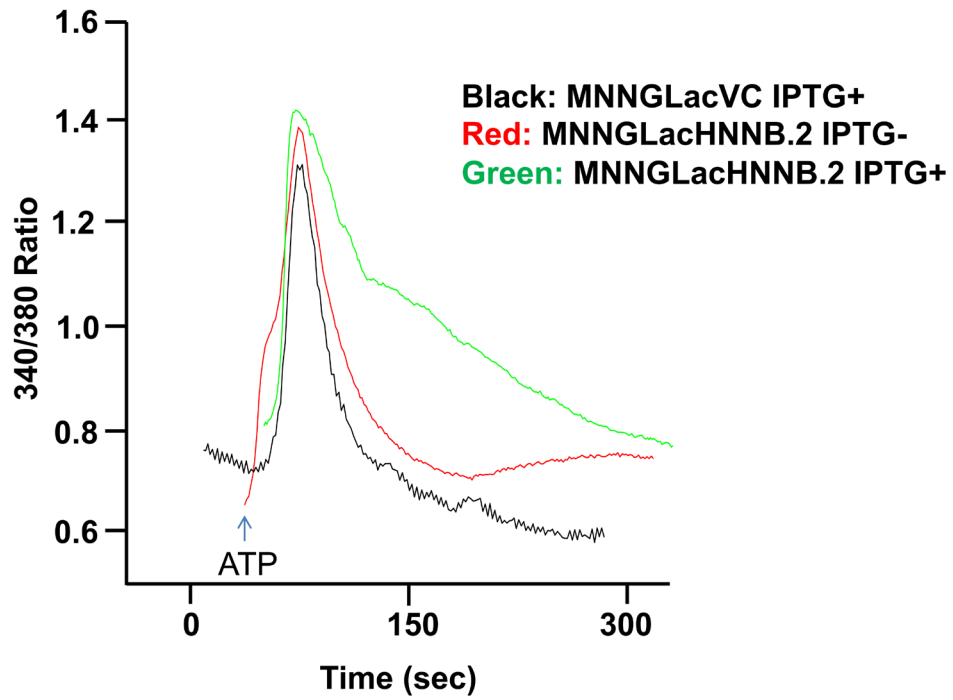

**Supplementary Figure 4:  $[Ca^{2+}]_i$  was measured by fluorescence imaging in fura-2/AM-loaded cells following ATP stimulation.** HNNB cells were imaged with and without IPTG induction of NNAT $\beta$  expression. VC cells are vector-control non-expressors. Shown are representative tracings from 3 replicate experiments.
